# Supplementary material for: Caenorhabditis elegans Extracts Stimulate IAA Biosynthesis in Arthrobacter pascens ZZ21 via the Indole-3-pyruvic Acid Pathway
Source: MDPI journal article supplement (doi:10.3390/microorganisms9050970), 2021-04-30
Supplement: s1 [file s1]

**Table S1** Primers used in this study.

| Primer Name | Sequence 5'–3' <sup>a</sup> |
|-------------|-----------------------------|
| iaaMF       | CCTGGAAAGCCGCTGTGA          |
| iaaMR       | GCCGTAGAAGGTCTGCTCGTC       |
| gatAF       | CGAAACCACCATCCGCTACG        |
| gatAR       | TGGAAGTGGCGAAGAAAGGC        |
| aamF        | GCAACATTGTCTGGCTTCAGG       |
| aamR        | CGGACCGAAAGACCTGGG          |
| prfF        | ACTTCGGTCCGCTGAACAAC        |
| prfR        | CATCTCCACGGCTTCCTGTT        |
| puuCF       | GCCGCAGCAATCTCAAGC          |
| puuCR       | CCAGCAACGCAGCGAAGT          |
| aldHF       | GCAACACGGTGGTCTGGAAG        |
| aldHR       | GCCCAACAGGAACGGAACC         |
| 16sF        | GGTTGCGATACTGTGAGGTG        |
